# Supplementary material for: Mechanism of short-pulse-induced solute migration in comparison to continuous-light-driven thermal diffusion
Source: Royal Society of Chemistry journal article supplement (doi:10.1039/c5ra25607k), 2016-01-01
Supplement: c5ra25607k1.pdf [file c5ra25607k1.pdf]

**Supporting Information for:**

**Mechanism of short-pulse-induced solute migration in comparison to  
continuous-light-driven thermal diffusion**

**Li-Shu Lee,<sup>a</sup> Yu-Ting Kuo,<sup>a</sup> Chi-Chen Wang,<sup>a</sup> Yi-Ci Li,<sup>a</sup> Po-Yuan Huang,<sup>a</sup> Cheng-I Lee<sup>b,†</sup> and  
Tai-Huei Wei<sup>a,†</sup>**

*<sup>a</sup>Department of Physics, National Chung Cheng University, Min-Hsiung, Chia-Yi 621, Taiwan*

*<sup>b</sup>Department of Life Science, National Chung Cheng University, Min-Hsiung, Chia-Yi 621, Taiwan*

†Authors to whom correspondence should be addressed;

E-mails: biocil@ccu.edu.tw (C.I.L.); twei@ccu.edu.tw (T.H.W.).

Tel.: +886-5-272-0411 (ext 66511) (C.I.L.); Fax: +886-5-2722871 (C.I.L.);

Tel.: +886-5-272-0411 (ext 66324) (T.H.W.); Fax: +886-5-2720587 (T.H.W.).

The aim of this **Supporting Information (SI)** is to calculate the pulse energy absorbed by individual CIAIPc molecules ( $\Delta\varepsilon_p$ ) dissolved in ethanol (EtOH) at two concentrations,  $4.2 \times 10^{17} \text{ cm}^{-3}$  and  $1.2 \times 10^{17} \text{ cm}^{-3}$ . Given that the Beer's law equation (eqn (5)) and the associated population-change-rate equations (eqn (6)-(8)) govern the time rate of pulse energy absorption by CIAIPc molecules in a unit of volume, collectively, we numerically derive  $\Delta\varepsilon_p$  by tracking the excitation and relaxation behaviors of individual CIAIPc molecules (in addition to alternately integrating eqn (5) and eqn (6)-(8) to evaluate the intensity  $I(z',r,t)$  and population densities of the  $S_0$ ,  $S_1$  and  $S_2$  states, denoted by  $N_{S_0}(z',r,t)$ ,  $N_{S_1}(z',r,t)$  and  $N_{S_2}(z',r,t)$ , respectively). Here,  $z'$  denotes the penetration depth of a pulse into the sample and falls in the range  $[0, L=1 \text{ mm}]$  with  $L$  being the sample thickness,  $r$  the lateral distance relative to the laser beam axis and  $t$  the time relative to the pulse peak. In the following, we first show how we evaluate  $I(z',r,t)$  and  $N's(z',r,t)$  specified by the subscripts by alternately integrating eqn (5) and eqn (6)-(8). Afterward, we explain how we derive  $\Delta\varepsilon_p$  by counting the numbers of one-photon  $S_0 \rightarrow |v\rangle S_1$ , two-photon  $S_0 \rightarrow |v\rangle S_2$  and one-photon  $|0\rangle S_1 \rightarrow |v\rangle S_2$  excitation processes that individual CIAIPc molecules experience in the course of pulse-matter interaction.

As mentioned in the **Main Text**, The intensity of each laser pulse incident on the sample's front surface at a certain position  $z$  relative the beam waist is denoted by  $I(z'=0,r,t)=I_z(r,t)$  given by eqn (1). When each pulse has a width of  $\tau=19 \text{ ps}$  ( $\text{HWE}^{-1}\text{M}$ ), we ignore the pulse for the time beyond  $\pm 3\tau$  ( $\pm 57 \text{ ps}$ ) when simulating the pulse-matter interaction. This is because the intensity outside the time range  $[-3\tau, 3\tau]$  is vanishingly small. When the pulse-matter interaction starts at  $t=-3\tau$ , CIAIPc/EtOH is in full thermodynamic (thermal, mechanical and chemical) equilibrium with  $N_{S_1}(z',r,-3\tau)=N_{S_2}(z',r,-3\tau)=0$  and  $N_{S_0}(z',r,-3\tau)=4.2 \times 10^{17} \text{ cm}^{-3}$  or  $1.2 \times 10^{17} \text{ cm}^{-3}$  throughout the whole solution.

In our numerical integration of  $I(z',r,t)$  and  $N's(z',r,t)$  and derivation of  $\Delta\varepsilon_p$ , we slice the sample into 10 layers and divide each pulse into 5000 temporal segments. Therefore, each layer of the sample has a thickness of  $\Delta z'=0.1 \text{ mm}$  and each temporal segment of a pulse has a width of  $\Delta t=6\tau/5000=22.8 \text{ fs}$ . Labeling each layer of the sample by an integer  $m$  ranging between 1 and 10, we denote the depths for the leading and closing edges of the  $m^{\text{th}}$  layer by  $z'_{mb}=(m-1)\Delta z'$  and  $z'_{mf}=z'_{(m+1)b}=m\Delta z'$ , respectively. Labeling each temporal segment of a pulse by an integer  $n$  ranging between 1 and 5000, we denote the times for the leading and the closing edges of the  $n^{\text{th}}$  temporal segment by  $t_{nb}=-3\tau+(n-1)\Delta t$  and

$t_{nf}=t_{(n+1)b}=-3\tau+n\Delta t$ , respectively.

First of all, we deal with the interaction of a 19 ps pulse with the entrance layer ( $m=1$ ) of the sample ranging between  $z'_{1b}=0$  and  $z'_{1f}=0.1$  mm. By substituting the incident intensity  $I(z'_{1b},r,t)=I_z(r,t)$ , with  $t'=t_{nb}$  ( $1\leq n\leq 5000$ ), for  $I(z',r,t')$  on the right hand sides of eqn (6)-(8) and then integrating these three equations over  $t'$  from  $t_{nb}$  to  $t_{nf}$ , we obtain  $N_{S0}(z'_{1b},r,t)=N_{S0}(z'_{1b},r,t_{nb})+\Delta N_{S0}(z'_{1b},r,t_{nb})$ ,  $N_{S1}(z'_{1b},r,t)=N_{S1}(z'_{1b},r,t_{nb})+\Delta N_{S1}(z'_{1b},r,t_{nb})$  and  $N_{S2}(z'_{1b},r,t)=N_{S2}(z'_{1b},r,t_{nb})+\Delta N_{S2}(z'_{1b},r,t_{nb})$  with  $t=t_{nf}=t_{(n+1)b}$  ( $1\leq n\leq 5000$ ). Here

$$\Delta N_{S0} = \left( -\frac{\sigma_{S0}N_{S0}I}{\hbar\omega} - \frac{\beta N_{S0}I^2}{2\hbar\omega} \right) \times \Delta t, \quad (\text{S.1})$$

$$\Delta N_{S1} = \left( \frac{\sigma_{S0}N_{S0}I}{\hbar\omega} - \frac{\sigma_{S1}N_{S1}I}{\hbar\omega} + \frac{N_{S2}}{\tau_{S2}} \right) \times \Delta t \quad (\text{S.2})$$

and

$$\Delta N_{S2} = \left( \frac{\beta N_{S0}I^2}{2\hbar\omega} + \frac{\sigma_{S1}N_{S1}I}{\hbar\omega} - \frac{N_{S2}}{\tau_{S2}} \right) \times \Delta t, \quad (\text{S.3})$$

in which the arguments ( $z'_{1b},r,t_{nb}$ ) of  $I$ ,  $N$ 's and  $\Delta N$ 's are omitted. Note that after the above integrations  $N_{S0}(z'_{1b},r,t_{1b})=4.2\times 10^{17}\text{ cm}^{-3}$  or  $1.2\times 10^{17}\text{ cm}^{-3}$ ,  $N_{S1}(z'_{1b},r,t_{1b})=0$  and  $N_{S2}(z'_{1b},r,t_{1b})=0$  remain unchanged. Next, by substituting the concentrations  $N_{S0}(z'',r,t)$  and  $N_{S1}(z'',r,t)$ , with  $t=t_{nb}$  ( $1\leq n\leq 5000$ ), for  $N_{S0}(z'',r,t)$  and  $N_{S1}(z'',r,t)$  on the right hand side of eqn (5) and then integrating this equation over  $z''$  from  $z'_{1b}$  to  $z'_{1f}$ , we obtain  $I(z'_{1f},r,t)=I(z'_{2b},r,t)=I(z'_{1b},r,t)+\Delta I(z'_{1b},r,t)$  with  $t=t_{nb}$  ( $1\leq n\leq 5000$ ). Here

$$\Delta I = \left[ -(\sigma_{S0}N_{S0} + \sigma_{S1}N_{S1}) \times I - \beta N_{S0} \times I^2 \right] \times \Delta z', \quad (\text{S.4})$$

in which the arguments ( $z'_{1b},r,t_{nb}$ ) of  $I$ ,  $N$ 's and  $\Delta I$  are omitted. During this integration, we consider that  $N$ 's( $z'',r,t_{nb}$ ) equals  $N$ 's( $z'_{1b},r,t_{nb}$ ) and does change with  $z''$ .

Secondly, we consider the 19 ps pulse advances to the second layer of the sample ranging between  $z'_{2b}=0.1$  mm and  $z'_{2f}=0.2$  mm. By substituting  $I(z'_{2b},r,t')$ , with  $t'=t_{nb}$  ( $1\leq n\leq 5000$ ), for  $I(z',r,t')$  on the right hand sides of eqn (6)-(8) and then integrating these three equations over  $t'$  from  $t_{nb}$  to  $t_{nf}$ , we

obtain  $N_{S0}(z'_{2b}, r, t) = N_{S0}(z'_{2b}, r, t_{nb}) + \Delta N_{S0}(z'_{2b}, r, t_{nb})$ ,  $N_{S1}(z'_{2b}, r, t) = N_{S1}(z'_{2b}, r, t_{nb}) + \Delta N_{S1}(z'_{2b}, r, t_{nb})$ , and  $N_{S2}(z'_{2b}, r, t) = N_{S2}(z'_{2b}, r, t_{nb}) + \Delta N_{S2}(z'_{2b}, r, t_{nb})$ , with  $t = t_{nf} = t_{(n+1)b}$  ( $1 \leq n \leq 5000$ ). Here  $\Delta N_{S0}(z'_{2b}, r, t_{nb})$ ,  $\Delta N_{S1}(z'_{2b}, r, t_{nb})$  and  $\Delta N_{S2}(z'_{2b}, r, t_{nb})$  can be derived from eqn (S.1)-(S.3) with  $(z'_{2b}, r, t_{nb})$  being the arguments of  $I$ ,  $N$ 's and  $\Delta N$ 's. Note that after the above integrations  $N_{S0}(z'_{2b}, r, t_{1b}) = 4.2 \times 10^{17} \text{ cm}^{-3}$  or  $1.2 \times 10^{17} \text{ cm}^{-3}$ ,  $N_{S1}(z'_{2b}, r, t_{1b}) = 0$  and  $N_{S2}(z'_{2b}, r, t_{1b}) = 0$  remain unchanged. Next, by substituting the concentrations  $N_{S0}(z'', r, t)$  and  $N_{S1}(z'', r, t)$ , with  $t = t_{nb}$  ( $1 \leq n \leq 5000$ ), for  $N_{S0}(z'', r, t)$  and  $N_{S1}(z'', r, t)$  on the right hand side of eqn (5) and then integrating this equation over  $z''$  from  $z'_{2b}$  to  $z'_{2f}$ , we obtain  $I(z'_{2f}, r, t) = I(z'_{3b}, r, t) = I(z'_{2b}, r, t) + \Delta I(z'_{2b}, r, t)$  with  $t = t_{nb}$  ( $1 \leq n \leq 5000$ ). Here  $\Delta I(z'_{2b}, r, t_{nb})$  can be derived from eqn (S.4) with  $(z'_{2b}, r, t_{nb})$  being the arguments of  $I$ ,  $N$ 's and  $\Delta I$ . During this integration, we consider that  $N$ 's( $z'', r, t_{nb}$ ) equals  $N$ 's( $z'_{2b}, r, t_{nb}$ ) and does not change with  $z''$ .

Finally, by repeating the same procedures, we advance the 19 ps pulse, in increments of 0.1 mm, to the last layer of the sample ranging between  $z'_{10b} = 0.9$  mm and  $z'_{10f} = 1.0$  mm. In each layer of the sample, we derive  $I(z', r, t)$  as well as  $N_{S0}(z', r, t)$ ,  $N_{S1}(z', r, t)$  and  $N_{S2}(z', r, t)$  with  $z' = z'_{1b}$  and  $z'_{10f}$  ( $1 \leq m \leq 10$ ) as well as  $t = t_{1b}$  and  $t_{nf}$  ( $1 \leq n \leq 5000$ ). In summary, all  $N$ 's( $z', r, t$ ) at  $t = t_{nf}$  can be related to those at  $t = t_{nb}$  ( $1 \leq n \leq 5000$ )

$$N_{S1}(t_{nf}) = N_{S1}(t_{nb}) + \left[ \frac{\sigma_{S0} N_{S0}(t_{nb}) I(t_{nb})}{\hbar \omega} - \frac{\sigma_{S1} N_{S1}(t_{nb}) I(t_{nb})}{\hbar \omega} + \frac{N_{S2}(t_{nb})}{\tau_{S2}} \right] \times \Delta t, \quad (\text{S.5})$$

$$N_{S2}(t_{nf}) = N_{S2}(t_{nb}) + \left[ \frac{\beta N_{S0}(t_{nb}) I^2(t_{nb})}{2\hbar \omega} + \frac{\sigma_{S1}(t_{nb}) I(t_{nb})}{\hbar \omega} - \frac{N_{S2}(t_{nb})}{\tau_{S2}} \right] \times \Delta t \quad (\text{S.6})$$

and

$$N_{S0}(t_{nf}) = N_{S0}(-3\tau) - N_{S1}(t_{nf}) - N_{S2}(t_{nf}). \quad (\text{S.7})$$

For simplicity, we have dropped the arguments  $z'$  and  $r$  of  $N_{S0}(z', r, t)$ ,  $N_{S1}(z', r, t)$  and  $N_{S2}(z', r, t)$  in eqn (S.5)-(S.7).

When deriving  $N_{S0}(z', r, t)$ ,  $N_{S1}(z', r, t)$  and  $N_{S2}(z', r, t)$  by integrating eqn (S.5)-(S.7), we additionally track the excitation and relaxation behaviors of individual ClAlPc molecules by counting the number of one-photon  $S_0 \rightarrow |\nu\rangle S_1$ , two-photon  $S_0 \rightarrow |\nu\rangle S_2$  and one-photon  $|0\rangle S_1 \rightarrow |\nu\rangle S_2$  excitation processes that individual ClAlPc molecules on  $|0\rangle S_1$  and  $|0\rangle S_2$  have experienced up to any time  $t \leq 3\tau$ . Accordingly,

we decompose  $N_{S1}(z',r,t)$  and  $N_{S2}(z',r,t)$  into their components  $N_{ES1}(i;z',r,t)$  and  $N_{ES2}(i;z',r,t)$  which designate the concentrations of CIAIPc molecules on  $|0\rangle S_1$  and  $|0\rangle S_2$  that have absorbed  $i$  photons ( $i \geq 1$ ) up to  $t \leq 3\tau$ .  $N_{ES1}(i;z',r,t) + N_{ES2}(i;z',r,t)$ , denoted by  $N_E(i;z',r,t)$  henceforth, designates the concentrations of CIAIPc molecules on  $S_0$ ,  $|0\rangle S_1$  or  $|0\rangle S_2$  (all the CIAIPc molecules indeed) that have individually absorbed  $i$  photons with energy of  $i\hbar\omega$  ( $i \geq 1$ ) up to  $t \leq 3\tau$ . Because CIAIPc molecules relaxing to  $S_0$  from  $|0\rangle S_1$ , with a fluorescent lifetime  $\tau_f$  (12.1 ns) greatly longer than  $\tau$  (19 ps), are neglected during the pulse-matter interaction,  $N_{S0}(z',r,t)$  does not actually contribute to  $N_E(i;z',r,t)$  for  $i \geq 1$ . For simplicity, we drop the arguments  $z'$ ,  $r$  or  $t$ , of  $I(z',r,t)$ ,  $N_{S0}(z',r,t)$ ,  $N_{S1}(z',r,t)$ ,  $N_{S2}(z',r,t)$ ,  $N_{ES1}(i;z',r,t)$ ,  $N_{ES2}(i;z',r,t)$  and  $N_E(i;z',r,t)$ , fully or partially, in the following unless it is necessary to express them explicitly.

Given  $N_{ES1}(i;t_{1b}) = N_{S1}(t_{1b}) = 0$ ,  $N_{ES2}(i;t_{1b}) = N_{S2}(t_{1b}) = 0$  and  $N_{S0}(t_{1b}) = 4.2 \times 10^{17} \text{ cm}^{-3}$  or  $1.2 \times 10^{17} \text{ cm}^{-3}$ ,  $|0\rangle S_1$  and  $|0\rangle S_2$  are respectively populated, in the time range  $[t_{1b}, t_{1f}]$ , by one-photon  $S_0 \rightarrow |1\rangle S_1$  and two-photon  $S_0 \rightarrow |2\rangle S_2$  excitations of the solute molecules pertaining to  $N_{S0}(t_{1b})$ . Therefore, after the first temporal segment of a pulse, falling in the time range  $[t_{1b}, t_{1f}]$ , traverses the sample, both  $N_{ES1}(i;t_{1f})$  and  $N_{ES2}(i;t_{1f})$  have a single nonzero component

$$N_{ES1}(1;t_{1f}) = N_{S1}(t_{1f}) \quad (\text{S.8})$$

and

$$N_{ES2}(2;t_{1f}) = N_{S2}(t_{1f}). \quad (\text{S.9})$$

Both  $N_{S1}(t_{1f})$  and  $N_{S2}(t_{1f})$  on the right hand side of eqn (S.8) and (S.9) are derived from eqn (S.5) and (S.6) with  $n$  set to be 1.

After the second temporal segment, falling in the time range  $[t_{2b}, t_{2f}]$ , of this pulse traverses the sample, the solute molecules on  $|0\rangle S_1$  may have absorbed one or two photons according to eqn (S.5)-(S.7) in combination with eqn (S.8) and (S.9). Hence  $N_{ES1}(i;t_{2f})$  has the following two nonzero components

$$N_{ES1}(1;t_{2f}) = N_{ES1}(1;t_{2b}) + \left[ \frac{\sigma_{S0} N_{S0}(t_{2b}) I(t_{2b})}{\hbar\omega} - \frac{\sigma_{S1} N_{ES1}(1;t_{2b}) I(t_{2b})}{\hbar\omega} \right] \times \Delta t \quad (\text{S.10})$$

and

$$N_{ES1}(2;t_{2f}) = \frac{N_{ES2}(2;t_{2b})}{\tau_{S2}} \times \Delta t. \quad (\text{S.11})$$

When the first term on the right hand side of eqn (S.10), i.e.,  $N_{ES1}(1;t_{2b}=t_{1f})$  derived from eqn (S.8),

is the initial condition, the second and third terms denote the change of  $N_{\text{ES1}}(i=1)$  induced in this temporal segment by one-photon  $S_0 \rightarrow |\nu\rangle S_1$  and  $|0\rangle S_1 \rightarrow |\nu\rangle S_2$  excitation of the solute molecules pertaining to  $N_{S_0}(t_{2b})$  and  $N_{\text{ES1}}(1;t_{2b})$ . Eqn (S.11) shows the change of  $N_{\text{ES1}}(i=2)$  induced in this temporal segment by  $|\nu\rangle S_2 \rightsquigarrow |0\rangle S_2 \rightsquigarrow |\nu\rangle S_1 \rightsquigarrow |0\rangle S_1$  relaxation of the solute molecules pertaining to  $N_{\text{ES2}}(2;t_{2b})$ . Here,  $\tau_{S_2}=900$  fs (the  $|\nu\rangle S_2 \rightsquigarrow |0\rangle S_2 \rightsquigarrow |\nu\rangle S_1 \rightsquigarrow |0\rangle S_1$  relaxation lifetime) is much longer than the temporal segment width of  $\Delta t=22.8$  fs. The initial condition  $N_{\text{ES1}}(2;t_{2b})=0$  is omitted herein. Analogously,  $N_{\text{ES2}}(i;t_{2f})$  has only one nonzero component

$$N_{\text{ES2}}(2;t_{2f}) = N_{\text{ES2}}(2;t_{2b}) + \left[ \frac{\beta N_{S_0}(t_{2b}) I^2(t_{2b})}{2\hbar\omega} + \frac{\sigma_{S_1} N_{\text{ES1}}(1;t_{2b}) I(t_{2b})}{\hbar\omega} - \frac{N_{\text{ES2}}(2;t_{2b})}{\tau_{S_2}} \right] \times \Delta t. \quad (\text{S.12})$$

When the first term on the right hand side of eqn (S.12),  $N_{\text{ES2}}(2;t_{2b}=t_{1f})$  derived from eqn (S.9), is the initial condition, the second through the fourth terms respectively denote the changes of  $N_{\text{ES2}}(i=2)$  induced in this temporal segment by two-photon  $S_0 \rightarrow |\nu\rangle S_2$  excitation of the solute molecules pertaining to  $N_{S_0}(t_{2b})$ , one-photon  $|0\rangle S_1 \rightarrow |\nu\rangle S_2$  excitation of the solute molecules pertaining to  $N_{\text{ES1}}(1;t_{2b})$  and  $|\nu\rangle S_2 \rightsquigarrow |0\rangle S_2 \rightsquigarrow |\nu\rangle S_1 \rightsquigarrow |0\rangle S_1$  relaxation of the solute molecules pertaining to  $N_{\text{ES2}}(2;t_{2b})$ .  $N_{S_0}(t_{2b})$  in the second terms of both eqn (S.10) and (S.12) is derived from eqn (S.5)-(S.7) with  $n$  set to be 1.

After the third segment, falling in the time range  $[t_{3b}, t_{3f}]$ , of this pulse traverses the sample, the solute molecules on  $|0\rangle S_1$  may have absorbed one or two photons and those on  $|0\rangle S_2$  may have absorbed two or three photons according to eqn (S.5)-(S.7) in combination with eqn (S.10)-(S.12). Hence  $N_{\text{ES1}}(i;t_{3f})$  and  $N_{\text{ES2}}(i;t_{3f})$  respectively contain two nonzero components

$$N_{\text{ES1}}(1;t_{3f}) = N_{\text{ES1}}(1;t_{3b}) + \left[ \frac{\sigma_{S_0} N_{S_0}(t_{3b}) I(t_{3b})}{\hbar\omega} - \frac{\sigma_{S_1} N_{\text{ES1}}(1;t_{3b}) I(t_{3b})}{\hbar\omega} \right] \times \Delta t, \quad (\text{S.13})$$

$$N_{\text{ES1}}(2;t_{3f}) = N_{\text{ES1}}(2;t_{3b}) - \left[ \frac{\sigma_{S_1} N_{\text{ES1}}(2;t_{3b}) I(t_{3b})}{\hbar\omega} - \frac{N_{\text{ES2}}(2;t_{3b})}{\tau_{S_2}} \right] \times \Delta t, \quad (\text{S.14})$$

$$N_{\text{ES2}}(2;t_{3f}) = N_{\text{ES2}}(2;t_{3b}) + \left[ \frac{\beta N_{S_0}(t_{3b}) I^2(t_{3b})}{2\hbar\omega} + \frac{\sigma_{S_1} N_{\text{ES1}}(1;t_{3b}) I(t_{3b})}{\hbar\omega} - \frac{N_{\text{ES2}}(2;t_{3b})}{\tau_{S_2}} \right] \times \Delta t \quad (\text{S.15})$$

and

$$N_{\text{ES}2}(3; t_{3f}) = \frac{\sigma_{\text{S}1} N_{\text{ES}1}(2; t_{3b}) I(t_{3b})}{\hbar \omega} \times \Delta t. \quad (\text{S.16})$$

When the first terms on the right hand side of eqn (S.13)-(S.15) obtained from eqn (S.10)-(S.12) with  $t_{2f}$  replaced by  $t_{3b}$ , are the initial conditions, the subsequent terms denote the changes induced in this temporal segment by one-photon  $\text{S}_0 \rightarrow |\nu\rangle\text{S}_1$  and  $|0\rangle\text{S}_1 \rightarrow |\nu\rangle\text{S}_2$  excitation of the solute molecules pertaining to  $N_{\text{S}0}(t_{3b})$  and  $N_{\text{ES}1}(1; t_{3b})$  respectively (related to eqn (S.13)), one-photon  $|0\rangle\text{S}_1 \rightarrow |\nu\rangle\text{S}_2$  excitation and  $|\nu\rangle\text{S}_2 \rightsquigarrow |0\rangle\text{S}_2 \rightsquigarrow |\nu\rangle\text{S}_1 \rightsquigarrow |0\rangle\text{S}_1$  relaxation of the solute molecules pertaining to  $N_{\text{ES}1}(2; t_{3b})$  and  $N_{\text{ES}2}(2; t_{3b})$ , respectively (related to eqn (S.14)) as well as two-photon  $\text{S}_0 \rightarrow |\nu\rangle\text{S}_2$  excitation, one-photon  $|0\rangle\text{S}_1 \rightarrow |\nu\rangle\text{S}_2$  excitation and  $|\nu\rangle\text{S}_2 \rightsquigarrow |0\rangle\text{S}_2 \rightsquigarrow |\nu\rangle\text{S}_1 \rightsquigarrow |0\rangle\text{S}_1$  relaxation of the solute molecules pertaining to  $N_{\text{S}0}(t_{3b})$ ,  $N_{\text{ES}1}(1; t_{3b})$  and  $N_{\text{ES}2}(2; t_{3b})$ , respectively (related to eqn (S.15)). The initial condition of eqn (S.16)  $N_{\text{ES}2}(3; t_{3b})=0$  is omitted herein. The only term on the right hand side denotes the change of  $N_{\text{ES}2}(i=3)$  induced in this temporal segment by one-photon  $|0\rangle\text{S}_1 \rightarrow |\nu\rangle\text{S}_2$  excitation of the solute molecules pertaining to  $N_{\text{ES}1}(2; t_{3b})$ .  $N_{\text{S}0}(t_{3b})$  in the second terms of both eqn (S.13) and (S.15) is derived from eqn (S.5)-(S.7) with  $n$  set to be 2.

When  $n$  exceeds 3 and is even, we analogize the above processes to obtain

$$N_{\text{ES}1}[(n/2+1); t_{nf}] = \frac{N_{\text{ES}2}[(n/2+1); t_{nb}]}{\tau_{\text{S}2}} \times \Delta t, \quad (\text{S.17})$$

$$N_{\text{ES}1}(i; t_{nf}) = N_{\text{ES}1}(i; t_{nb}) - \left[ \frac{\sigma_{\text{S}1} N_{\text{ES}1}(i; t_{nb}) I(t_{nb})}{\hbar \omega} - \frac{N_{\text{ES}2}(i; t_{nb})}{\tau_{\text{S}2}} \right] \times \Delta t \quad (\text{S.18})$$

and

$$N_{\text{ES}2}(i+1; t_{nf}) = N_{\text{ES}2}(i+1; t_{nb}) + \left[ \frac{\sigma_{\text{S}1} N_{\text{ES}1}(i; t_{nb}) I(t_{nb})}{\hbar \omega} - \frac{N_{\text{ES}2}(i+1; t_{nb})}{\tau_{\text{S}2}} \right] \times \Delta t \quad (\text{S.19})$$

with  $2 \leq i \leq n/2$ . On the other hand, when  $n$  exceeds 3 and is odd, we simply omit eqn (S.17) and retain eqn (S.18) and (S.19) for  $2 \leq i \leq (n+1)/2$ . No matter  $n$  is even or odd, for the case of  $i=1$ , we have

$$N_{\text{ES}1}(1; t_{nf}) = N_{\text{ES}1}(1; t_{nb}) + \left[ \frac{\sigma_{\text{S}0} N_{\text{S}0}(t_{nb}) I(t_{nb})}{\hbar \omega} - \frac{\sigma_{\text{S}1} N_{\text{ES}1}(1; t_{nb}) I(t_{nb})}{\hbar \omega} \right] \times \Delta t \quad (\text{S.20})$$

and

$$N_{\text{ES}2}(2; t_{nf}) = N_{\text{ES}2}(2; t_{nb}) + \left[ \frac{\beta N_{\text{S}0}(t_{nb}) I^2(t_{nb})}{2\hbar \omega} + \frac{\sigma_{\text{S}1} N_{\text{ES}1}(1; t_{nb}) I(t_{nb})}{\hbar \omega} - \frac{N_{\text{ES}2}(2; t_{nb})}{\tau_{\text{S}2}} \right] \times \Delta t. \quad (\text{S.21})$$

At the desired  $z$ ,  $z'$  and  $r$ , we sequentially integrate eqn (S.5)-(S.21) to derive  $N_{\text{ES}1}(i; z', r, 3\tau)$  with  $i$

ranging between 1 and 2501 and  $N_{ES2}(i; z', r, 3\tau)$  with  $i$  ranging between 2 and 2501. Accordingly, we derive  $N_E(i; z', r, 3\tau)$  as a function of  $i$  at three incident pulse energy levels (1.1, 4.5, and 8.7  $\mu\text{J}$ ), two concentrations,  $4.2 \times 10^{17} \text{ cm}^{-3}$  and  $1.2 \times 10^{17} \text{ cm}^{-3}$  and three penetration depths (0.1, 0.5 and 1.0 mm). The results are shown in Fig. 4 of the **Main Text**.
